# Supplementary material for: Triazole Derivatives Target 14α–Demethylase (LDM) Enzyme in Candida albicans Causing Ergosterol Biosynthesis Inhibition
Source: MDPI journal article supplement (doi:10.3390/jof8070688), 2022-06-29
Supplement: s1 [file s1]

## Supporting Information

### ***Candida albicans* causing ergosterol biosynthesis inhibition**

Irfan A. Rather <sup>1,2,\*</sup>, Jamal S.M. Sabir<sup>1,2</sup>, Amer H. Asseri<sup>3</sup>, Mohammad Younus Wani<sup>4,\*</sup>, and Aijaz Ahmad<sup>5,6,\*</sup>

<sup>1</sup> Department of Biological Sciences, Faculty of Science, King Abdulaziz University (KAU); Jeddah 21589, Saudi Arabia; [jsabir@kau.edu.sa](mailto:jsabir@kau.edu.sa)

<sup>2</sup> Centre of Excellence in Bionanoscience Research, King Abdulaziz University (KAU), Jeddah 21589, Saudi Arabia

<sup>3</sup> Biochemistry Department, Faculty of Science, King Abdulaziz University (KAU), Jeddah 21589, Saudi Arabia; [ahasseri@kau.edu.sa](mailto:ahasseri@kau.edu.sa)

<sup>4</sup> Department of Chemistry, College of Science, University of Jeddah, P.O. Box 80327, Jeddah 21589, Saudi Arabia; [mwani@uj.edu.sa](mailto:mwani@uj.edu.sa)

<sup>5</sup> Clinical Microbiology and Infectious Diseases, Faculty of Health Sciences, School of Pathology, University of Witwatersand, Johannesburg 2193, South Africa

<sup>6</sup> Infection Control Unit, Charlotte Maxeke, Johannesburg Academic Hospital, National Health Laboratory Service, Johannesburg 2193, South Africa; [aijaz.ahmad@wits.ac.za](mailto:aijaz.ahmad@wits.ac.za)

\* Correspondence: [ammm@kau.edu.sa](mailto:ammm@kau.edu.sa) (IAR); [aijaz.ahmad@wits.ac.za](mailto:aijaz.ahmad@wits.ac.za) (AA); [mwani@uj.edu.sa](mailto:mwani@uj.edu.sa) (YW))

**Table S1:** Docking profile of pta1, pta2, pta3 and fluconazole in complex with LDM enzyme.

**Table S2:** List of primers for ergosterol synthesis gene for RT-qPCR

**Scheme S1:** Synthesis of piperidine based 1,2,3-triazolylacetamide derivatives (pta1-pta3)

**Table S1:** Docking profile of pta1, pta2, pta3 and fluconazole in complex with LDM enzyme.

| Compounds   | Docking Score (kcal/mol) |
|-------------|--------------------------|
| pta-1       | -7.19                    |
| pta-2       | -7.53                    |
| pta-3       | -6.56                    |
| Fluconazole | -4.80                    |

**Table S2:** List of primers for ergosterol synthesis gene for RT-qPCR

| Gene         | Primer  | Sequence (5'-3')               | Amplicon length (bp) |
|--------------|---------|--------------------------------|----------------------|
| <i>ERG11</i> | Forward | CTC ATG GGG TTG CCA ATG TT TTT | 207                  |
|              | Reverse | GAG CAG CAT CAC GTC TC         |                      |
| <i>ACT1</i>  | Forward | TGG TGA TGA AGC CCA ATC CA CAT | 169                  |
|              | Reverse | TGG AGC TTC GGT CAA CA         |                      |

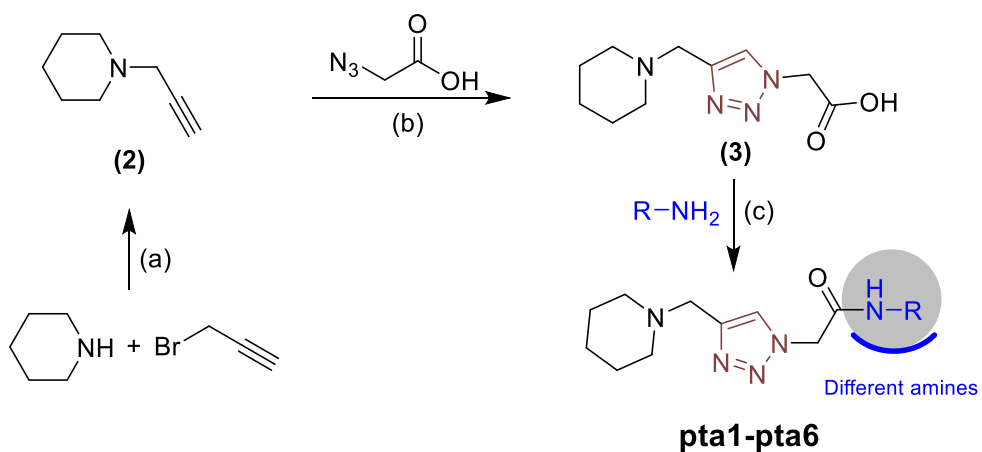

Reagents and conditions: (a) Dry Acetone, r.t, 1 min (b) Sodium ascorbate,  $\text{CuSO}_4 \cdot 5\text{H}_2\text{O}$ , DMF (c) HATU, DIPEA, DMF, 50 °C.

| Compound | R-NH <sub>2</sub><br>Different amines |
|----------|---------------------------------------|
| pta1     |                                       |
| pta2     |                                       |
| pta3     |                                       |

**Scheme S1:** Synthesis of piperidine based 1,2,3-triazolylacetamide derivatives (pta1-pta3)
